# Supplementary material
Source: PubMed Central journal article supplement (PMC3590255)
Supplement: auto-9-345-s01.pdf [file auto-9-345-s01.pdf]

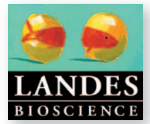

## **Supplemental Material to:**

**Chang Wook Park, Sun Mi Hong, Eung-Sam Kim,  
Jung Hee Kwon, Kyong-Tai Kim, Hong Gil Nam  
and Kwan Yong Choi**

**BNIP3 is degraded by ULK1-dependent autophagy  
via MTORC1 and AMPK**

**Autophagy 2012; 9(3)**

**<http://dx.doi.org/10.4161/auto.23072>**

**[www.landesbioscience.com/journals/autophagy/article/23072](http://www.landesbioscience.com/journals/autophagy/article/23072)**

## Supplementary information

### Supplementary methods

*Plasmid Construction.* Full-length *BNIP3* and *BNIP3*<sup>ΔTM</sup> (aa 1-163) were amplified from human cDNA pool by PCR using the following primers: *BNIP3* (FL) : Fw=5'-GAACAAGCTTATGTCGCAGAACGGAGCGC-3', Rv=5'-CAGGGAATTCACCCCAGGATCTAACAGCTC-3' and *BNIP3*<sup>ΔTM</sup> : Fw=5'-GAACAAGCTTATGTCGCAGAACGGAGCGC-3', Rv=5'-GAGGGAATTCTCATTTCAGAAATTCTGCAG-3'. The PCR products were cloned into HindIII and EcoRI sites of pFLAG-CMV-2 Expression Vector (Sigma, E7033). The construction was verified by DNA sequence analysis.

*Real-time quantitative PCR (qPCR).* RNA was isolated by RNAeasy kit (Qiagen, 74104) using the manufacturer's instructions. For cDNA synthesis, M-MLV Reverse Transcriptase (Ambion, AM2043) and SUPERase-In RNase Inhibitor (Ambion, AM2694) were used. qPCR was performed on Light Cycler 2.0 (Roche, 03531414001) using SYBR<sup>®</sup> Premix Ex Taq<sup>™</sup> (Takara, PR041A), and data were analyzed with the Light Cycler software 4.05 (Roche). Primers were designed using Primer3 software. The primers for human *BNIP3* were: (FW) 5'-GATACCAACAGGGCTTCTGAAACAG-3' and (RV) 5'-CAGAGAATATGCCCCCTTTCTTCA-3'. The *GAPDH* gene was used as control. The primer sequences of *GAPDH* were : (FW)5'-CCTGGTATGACAACGAATTT-3' and (RV)5'-GTACATGACAAGGTGCGGCT-3'. Copy number of target genes (relative to *GAPDH*) was determined by the  $2^{-\Delta\Delta Ct}$  method.

*Autophagy analysis.* Quantitative GFP-LC3 assay was performed in SK-Hep-1 cells. SK-Hep-1 cells were transfected with a GFP-LC3-expressing plasmid (a gift from Dr. J. Jung, USC, USA) and then stable cells were selected with 800 ug/ml G418 (Calbiochem, 345810) for 4 weeks. The cells were plated on coverslip and cultured in normoxia, hypoxia and hypoxia plus starvation, respectively. The cells were then fixed and mounted on glass slides, and visualized using a confocal microscope (Olympus, Fluoview FV 1000, Japan). To quantify GFP-LC3 puncta, at least 4 random fields were imaged and the average number of puncta/cell was calculated using the ImageJ software (NIH). For the LC3 flux assay, SK-Hep-1 cells pretreated with hypoxia for 24 h followed by DMEM or EBSS in the presence or absence of 10 nM BafA1. Cells were harvested and lysed, the LC3 band was analyzed by western blotting. We quantified MAP1LC3B-II/MAP1LC3B-I ratios by densitometry as described above.

*Immunoprecipitation.* SK-Hep-1 cells were transfected with Flag-*BNIP3* or Flag-*BNIP3* <sup>$\Delta$ TM</sup> expression vectors followed by the amino acid starvation in the presence or absence of Baf A1 or MG132. Cells were lysed in 1 ml ice-cold lysis buffer containing 40 mM HEPES pH 7.5, 120 mM NaCl, 1 mM EDTA, 10 mM pyrophosphate, 10 mM glycerophosphate, 50 mM NaF, 0.3% CHAPS or 0.1% NP-40 and one tablet of EDTA-free protease inhibitors (Roche, 04 693 124 001) per 10 ml. Cell extracts were incubated with anti-Flag antibody overnight at 4°C. Then, 30  $\mu$ l of Protein G-Sepharose was added. After incubation for 2 hrs, the immunoprecipitates were washed three times with the lysis buffer and subjected to immunoblotting.

*Colony formation assay.* Scrambled shRNA and *BNIP3* shRNA was transfected into SK-Hep-1 cells and selected for one month. The selected stable cell lines were plated at low

density (1000 cells/well) in 6 well plates and then grown in hypoxic conditions for 7 d.

Colonies are fixed and stained with crystal violet, and then colony numbers were counted.

Supplementary Table S1 : Primary antibodies used in the present study

| Target     | Host   | Type       | Titer  | Manufacturer                 | Cat. #            |
|------------|--------|------------|--------|------------------------------|-------------------|
| Flag       | Mouse  | monoclonal | 1:1000 | Sigma                        | F3165             |
| BNIP3L     | Mouse  | monoclonal | 1:1000 | Sigma                        | WH0000665<br>M1   |
| BNIP3      | Mouse  | monoclonal | 1:1000 | Novus                        | NB100–1543        |
| NBR1       | Mouse  | monoclonal | 1:1000 | Novus                        | H00004077-<br>M05 |
| LDHA       | Rabbit | monoclonal | 1:1000 | Cell Signaling<br>Technology | 2012              |
| RPS6KB1    | Rabbit | monoclonal | 1:1000 | Cell Signaling<br>Technology | 9202              |
| MAP1LC3B   | Rabbit | monoclonal | 1:1000 | Cell Signaling<br>Technology | 3868              |
| ATG7       | Rabbit | polyclonal | 1:1000 | Cell Signaling<br>Technology | 2631              |
| MTOR       | Rabbit | polyclonal | 1:1000 | Cell Signaling<br>Technology | 2972              |
| RPS6       | Rabbit | monoclonal | 1:4000 | Cell Signaling<br>Technology | 2217              |
| p-RPS6     | Rabbit | monoclonal | 1:4000 | Cell Signaling<br>Technology | 2211              |
| EIF4EBP1   | Rabbit | monoclonal | 1:4000 | Cell Signaling<br>Technology | 9644              |
| p-EIF4EBP1 | Rabbit | monoclonal | 1:4000 | Cell Signaling<br>Technology | 2855              |
| BAK1       | Rabbit | monoclonal | 1:1000 | Cell Signaling<br>Technology | 6947              |
| BID        | Rabbit | polyclonal | 1:1000 | Cell Signaling<br>Technology | 2002              |
| BAD        | Rabbit | polyclonal | 1:1000 | Cell Signaling<br>Technology | 9239              |
| BCL2L11    | Rabbit | monoclonal | 1:1000 | Cell Signaling<br>Technology | 2933              |
| BAX        | Rabbit | monoclonal | 1:1000 | Cell Signaling<br>Technology | 5023              |
| Actin      | Goat   | polyclonal | 1:4000 | Santa Cruz<br>Biotechnology  | sc-1615           |
| SQSTM1     | Mouse  | monoclonal | 1:1000 | Santa Cruz<br>Biotechnology  | sc-28359          |
| BECN1      | Rabbit | polyclonal | 1:1000 | Santa Cruz<br>Biotechnology  | sc-11427          |

|                                |            |            |                           |                           |           |
|--------------------------------|------------|------------|---------------------------|---------------------------|-----------|
| TP53                           | Mouse      | monoclonal | 1:1000                    | Santa Cruz Biotechnology  | sc-126    |
| HIF1A                          | Rabbit     | polyclonal | 1:1000                    | Bethyl Laboratories       | A300–286A |
| AMPK $\alpha$ /PRKAA1          | Rabbit     | monoclonal | 1:1000                    | Cell Signaling Technology | 5832      |
| p-AMPK $\alpha$ /PRKAA1 Rabbit | monoclonal | 1:1000     | Cell Signaling Technology | 2535                      |           |
| ULK1                           | Rabbit     | polyclonal | 1:1000                    | Cell Signaling Technology | 4773      |
| p-ULK1 (S555)                  | Rabbit     | monoclonal | 1:500                     | Cell Signaling Technology | 5869      |
| p-ULK1 (S757)                  | Rabbit     | polyclonal | 1:500                     | Cell Signaling Technology | 6888      |
| PIK3C3                         | Rabbit     | monoclonal | 1:500                     | Cell Signaling Technology | 4263      |
| MAP1LC3A                       | Rabbit     | monoclonal | 1:500                     | Cell Signaling Technology | 4599      |
| MAP1LC3C                       | Rabbit     | polyclonal | 1:2000                    | Millipore                 | AB15414   |
| TOMM20                         | Mouse      | monoclonal | 1:500                     | Santacruz                 | sc-17764  |
| COX4I1                         | Rabbit     | monoclonal | 1:1000                    | Cell Signaling Technology | 4850      |
| LAMP2                          | Rabbit     | monoclonal | 1:1000                    | Epitomics                 | 3660–1    |

Supplementary Table S2 : siRNA sequences

| Target          | Accession Number | Cat.#       | Sequence            |
|-----------------|------------------|-------------|---------------------|
| <i>BECN1</i>    | NM_003766        | D-010552-02 | GGAUGACAGUGAACAGUUA |
|                 |                  | D-010552-03 | UAAGAUGGGUCUGAAAUUU |
|                 |                  | D-010552-04 | GCCAACAGCUUCACUCUGA |
|                 |                  | D-010552-17 | UUGAAAACCAGAUGCGUUA |
| <i>MAP1LC3B</i> | NM_022818        | D-012846-01 | CAAAGUCCUUGUACCUGA  |
|                 |                  | D-012846-02 | GAUAAUAGAACGAUACAAG |
|                 |                  | D-012846-03 | GUAGAAGAUGUCCGACUUA |
|                 |                  | D-012846-04 | AGGAGACGUUCGGGAUGAA |
| <i>RPS6K</i>    | NM_003161        | J-003616-13 | CAUGGAACAUUGUGAGAAA |
|                 |                  | J-003616-14 | GGAAUGGGCAUAAGUUGUA |
|                 |                  | J-003616-15 | GUAAAUGGCUUGUGAUACU |
|                 |                  | J-003616-16 | CAAUUAGCAUGCAAGCUU  |
| <i>LAMP2</i>    | NM_002294        | D-011715-01 | AAUGAGUCCUGUGUGAUA  |
|                 |                  | D-011715-02 | CUACUUAGACUCAAUAGCA |
|                 |                  | D-011715-03 | ACAGUACGCUAUGAAACUA |
|                 |                  | D-011715-04 | GAUAAGGUUGCUUCAGUUA |
| <i>ULK1</i>     | NM_003565        | D-005049-01 | CCUAAAACGUGUCUUUUUU |
|                 |                  | D-005049-02 | ACUUGUAGGUGUUUAAGAA |
|                 |                  | D-005049-03 | GGUUAGCCCUGCCUGAAUC |
|                 |                  | D-005049-04 | UGUAGGUGUUUAAGAAUUG |

|                      |                            |             |                     |
|----------------------|----------------------------|-------------|---------------------|
| <i>MTOR</i>          | NM_004958                  | J-003008-11 | GGCCAUAGCUAGCCUCAUA |
|                      |                            | J-003008-12 | CAAAGGACUUCGCCCAUAA |
|                      |                            | J-003008-13 | GCAGAAUUGUCAAGGGUAU |
|                      |                            | J-003008-14 | CAAAGCACUACACUACAA  |
| <i>RPTOR</i>         | NM_020761                  | J-004107-05 | GGCCAUAGCUAGCCUCAUA |
|                      |                            | J-004107-06 | CAAAGGACUUCGCCCAUAA |
|                      |                            | J-004107-07 | GCAGAAUUGUCAAGGGUAU |
|                      |                            | J-004107-08 | CAAAGCACUACACUACAA  |
| <i>PIK3C3</i>        | NM_002647                  | J-005250-09 | CACCAAAGCUCAUCGACAA |
|                      |                            | J-005250-10 | AUAGAUAGCUCCAAAUA   |
|                      |                            | J-005250-11 | GAACAACGGUUUCGCUCUU |
|                      |                            | J-005250-12 | GAGAUGUACUUGAACGUAA |
| <i>MAP1LC3A</i>      | NM_032514,<br>NM_181509    | J-013579-05 | GGACGGCUUCCUCUAUAUG |
|                      |                            | J-013579-06 | CGGUGAUCAUCGAGCGCUA |
|                      |                            | J-013579-07 | UCGCGGACAUCUACGAGCA |
|                      |                            | J-013579-08 | UGAGCGAGUUGGUCAAGAU |
| <i>MAP1LC3<br/>C</i> | NM_001004343               | J-032399-09 | CUGGUCAGCAUGAGCGCAA |
|                      |                            | J-032399-10 | CGGUGGUAGUGGAGCGCUA |
|                      |                            | J-032399-11 | CAGAAAAUCCCAAGCGUCA |
|                      |                            | J-032399-12 | GUGUAAUGAGCUAGAGAU  |
| <i>ATG7</i>          | NM_001136031;<br>NM_006395 | J-020112-05 | CCAACACACUCGAGUCUUU |
|                      |                            | J-020112-06 | GAUCUAAAUCUCAACUGA  |
|                      |                            | J-020112-07 | GCCCACAGAUGGAGUAGCA |
|                      |                            | J-020112-08 | GCCAGAGGAUUCAACAUGA |



Supplementary Table S3 : shRNA sequences

| Target        | Accession Number | Cat.#              | Sequence                                                          |
|---------------|------------------|--------------------|-------------------------------------------------------------------|
| <i>ATG7</i>   | NM_006395.<br>1  | TRCN000000758<br>7 | CCGGCCCAGCTATTGGAACACTGTAC<br>TCGAGTACAGTGTTCCAATAGCTGGG<br>TTTTT |
|               |                  | TRCN000000758<br>5 | CCGGCCAGAGAGTTTACCTCTCATTC<br>TCGAGAATGAGAGGTAAACTCTCTGG<br>TTTTT |
| <i>BNIP3</i>  | NM_004052.<br>2  | TRCN000000783<br>2 | CCGGGCTTCTGAAACAGATACCCATC<br>TCGAGATGGGTATCTGTTTCAGAAGC<br>TTTTT |
|               |                  | TRCN000000783<br>3 | CCGGGAACTGCACTTCAGCAATAATC<br>TCGAGATTATTGCTGAAGTGCAGTTC<br>TTTTT |
| Non-Targeting |                  | SHC002V            | CCGGCAACAAGATGAAGAGCACCAAC<br>TCGAGTTGGTGCTCTTCATCTTGTTG<br>TTTTT |

# Sup. Fig. 1

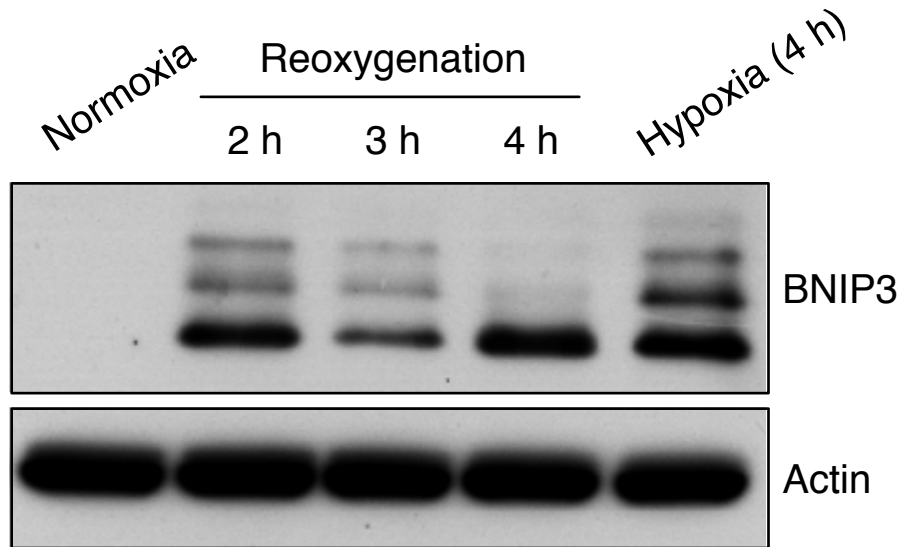

**Supplementary figure 1. Short-term reoxygenation has little effect on the BNIP3 degradation.** SK-Hep-1 cells were incubated under hypoxic conditions for 24 h and exposed to normoxia for indicated time points. For comparison, SK-Hep-1 cells were incubated under hypoxia and exposed to hypoxia for another 4 h. The BNIP3 level was assessed by western blot analysis.

# Sup. Fig. 2

A

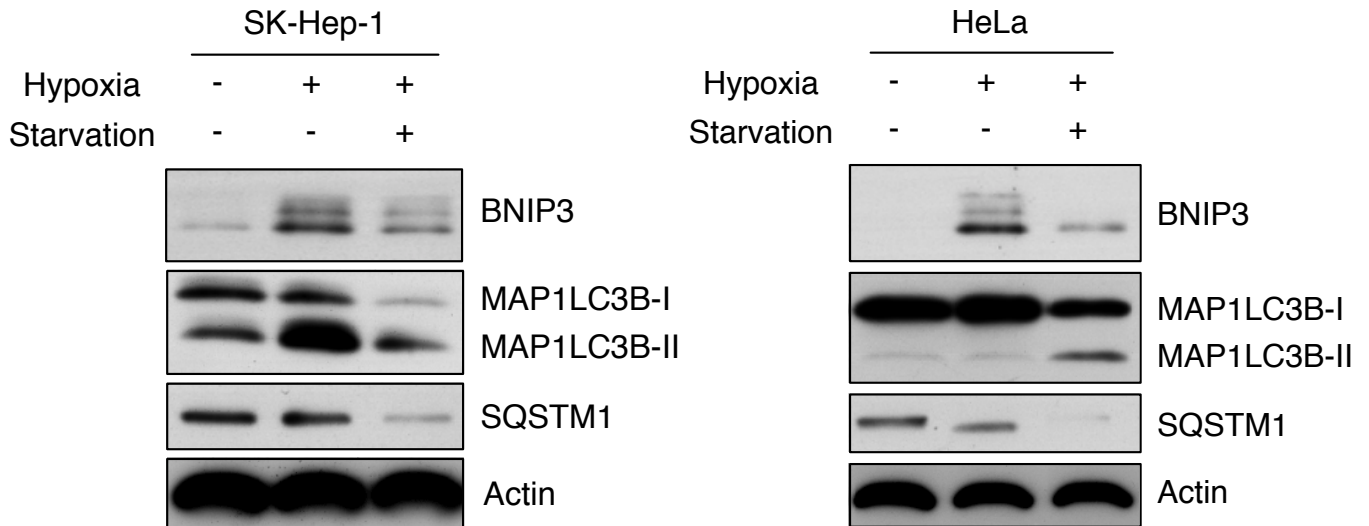

B

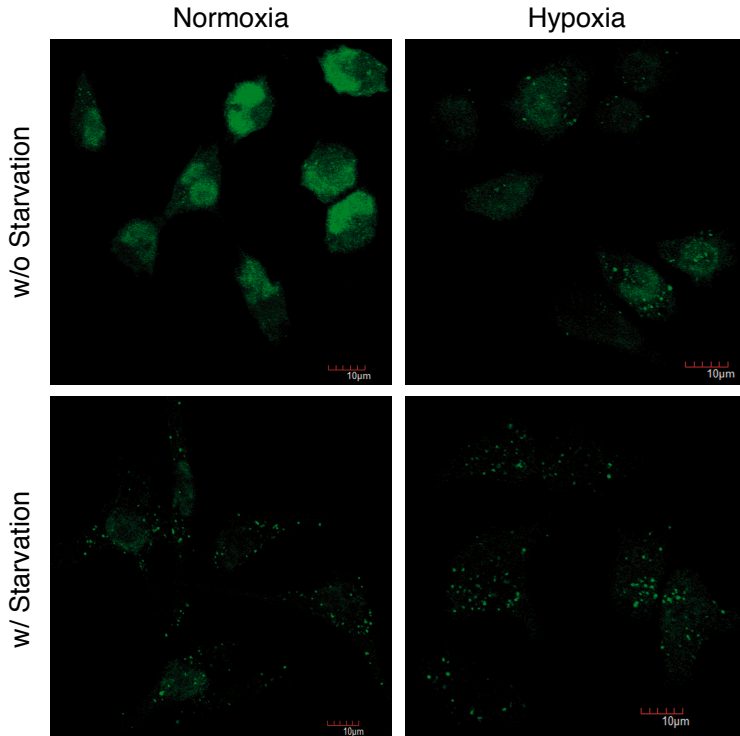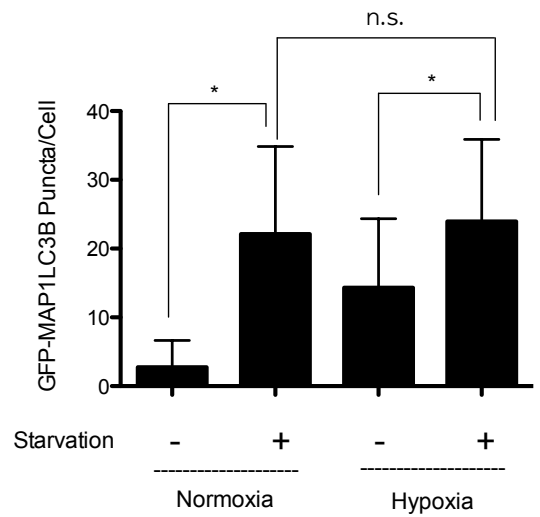

# Sup. Fig. 2

C

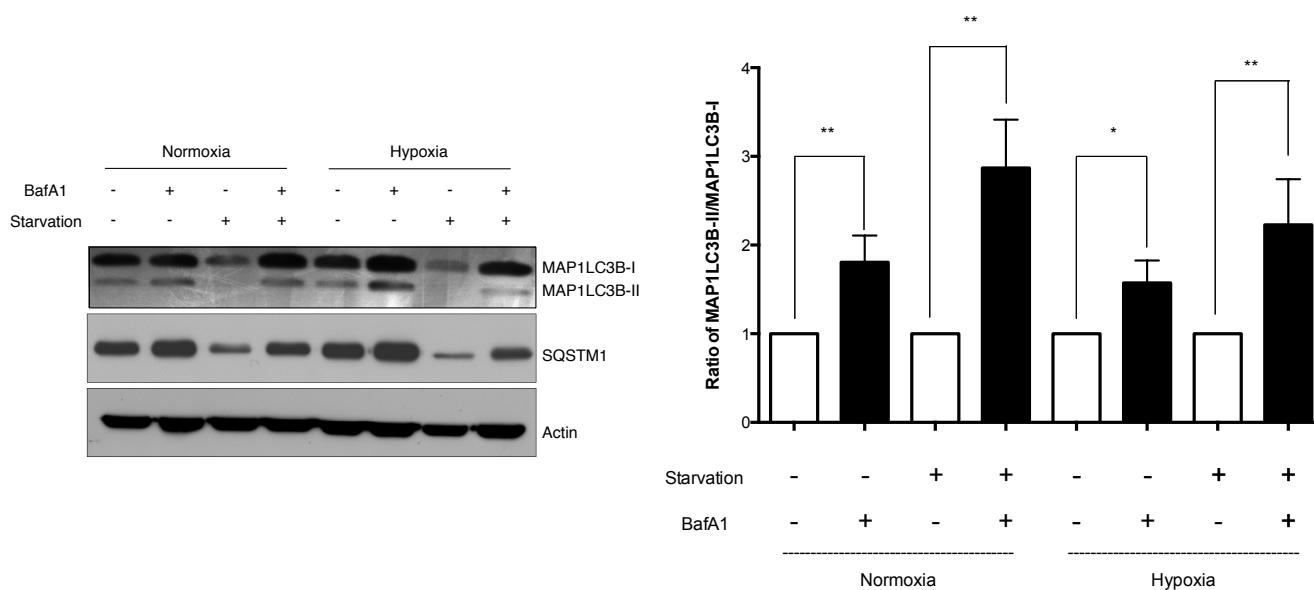

**Supplementary figure 2. Autophagy occurs under hypoxic-starved condition inducing BNIP3 degradation.** (A) SK-Hep-1 and HeLa cells were incubated under normoxic or hypoxic condition for 24 h followed by starvation under hypoxia for additional 4 h. The BNIP3 level was analyzed by western blotting. MAP1LC3B and SQSTM1 expression were used as autophagy markers. (B) SK-Hep-1 cells were transfected with *GFP-MAP1LC3B* and selected with G418. SK-Hep-1 cells stably expressing GFP-MAP1LC3B were exposed to normoxia and hypoxia for 24 h respectively or hypoxia (24 h) plus starvation (4 h) and then visualized by fluorescence microscopy (600 x). The number of GFP-MAP1LC3B dots was quantified using the ImageJ software. (C) SK-Hep-1 cells were exposed to normoxia or hypoxia in the presence or absence of amino acids and/or BafA1. The conversion of MAP1LC3B-I to MAP1LC3B-II, indicating the autophagy flux, was assessed by western blot analysis. Densitometric quantification of MAP1LC3B-II/MAP1LC3B-I levels were analyzed using the ImageJ software. The relative ratio of MAP1LCB-II/MAP1LC3B-I with the BafA1 treatment was compared with that without the treatment. Data are shown as means  $\pm$  S.D. for three separate experiments. \* $P < 0.05$ , \*\* $P < 0.0005$ , t test; n.s., not significant.

# Sup. Fig. 3

A

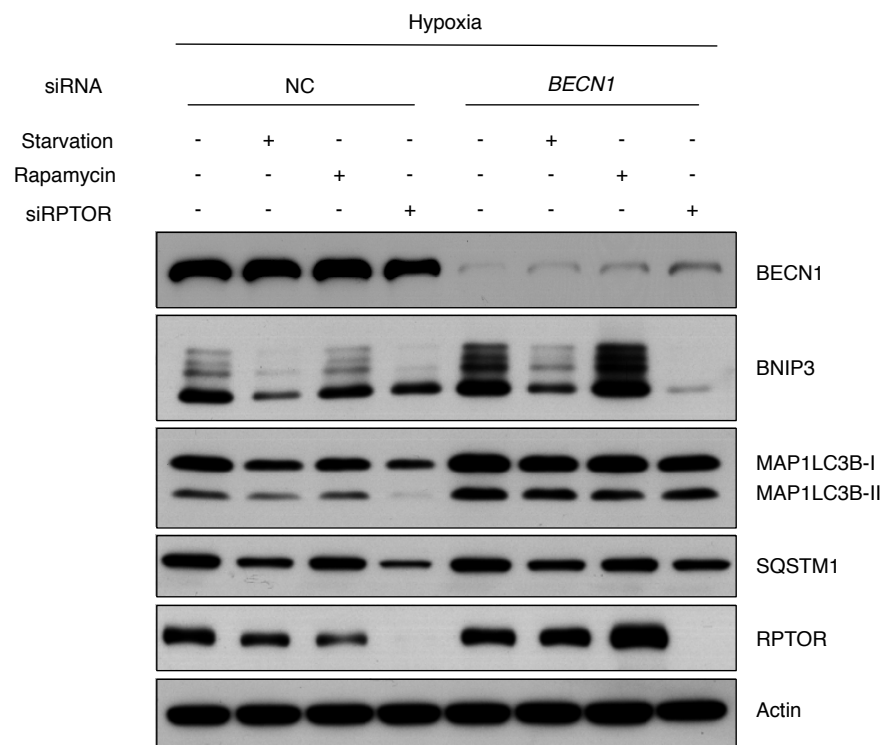

B

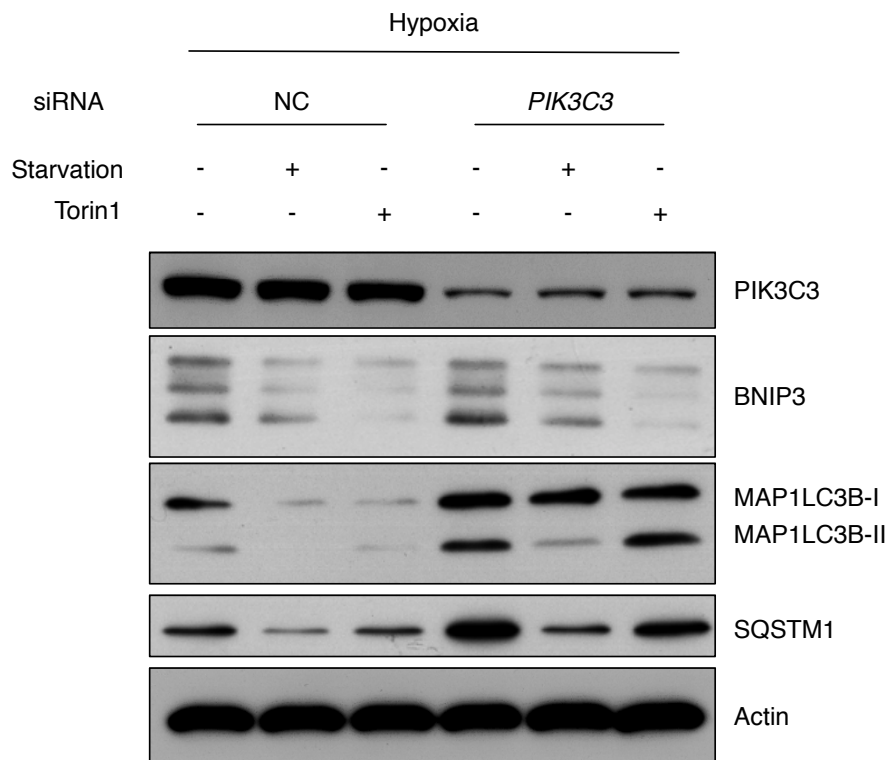

**Supplementary figure 3. Degradation of BNIP3 has little dependency on the BECN1 complex.**

(A) SK-Hep-1 cells were transfected with *BECN1* siRNA for 48 h and incubated under hypoxia for 24 h. Amino acid starvation or rapamycin treatment were performed for an additional 4 h. For the knockdown of RPTOR, SK-Hep-1 cells were transfected with *RPTOR* siRNA for 48 h following the transfection of *BECN1* siRNA. Subsequently, SK-Hep-1 cells were exposed to hypoxia for 24 h followed by western blot analysis. (B) SK-Hep-1 cells were transfected with *PIK3C3* siRNA for 48 h and exposed to hypoxia for 24 h. Amino acid starvation or Torin1 treatment were carried out for an additional 4 h followed by western blot analysis.

# Sup. Fig. 4

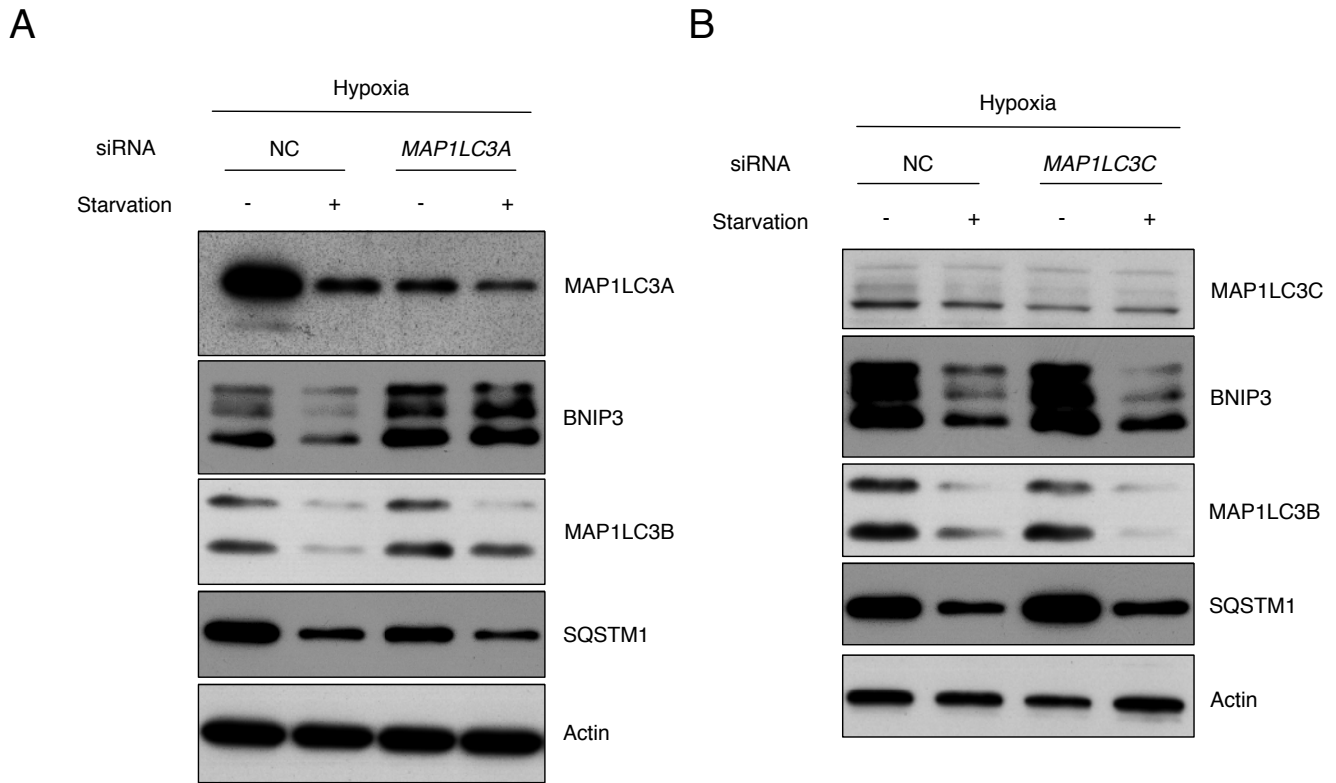

**Supplementary figure 4. Autophagic degradation of BNIP3 is dependent on MAP1LC3A, not MAP1LC3C.** SK-Hep-1 cells were transfected with *MAP1LC3A* (A) and *MAP1LC3C* (B) siRNAs for 48 h and exposed to hypoxia for 24 h. This was followed by a period of amino acid starvation for an additional 4 h and subsequent western blot analysis.

# Sup. Fig. 5

A

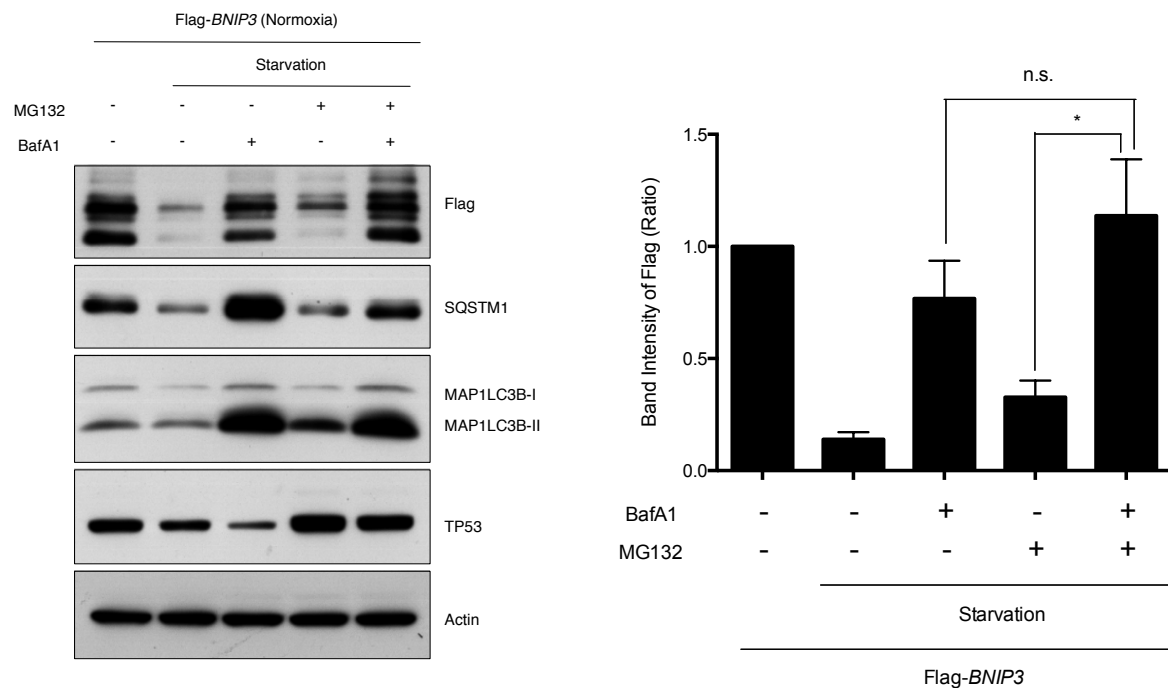

B

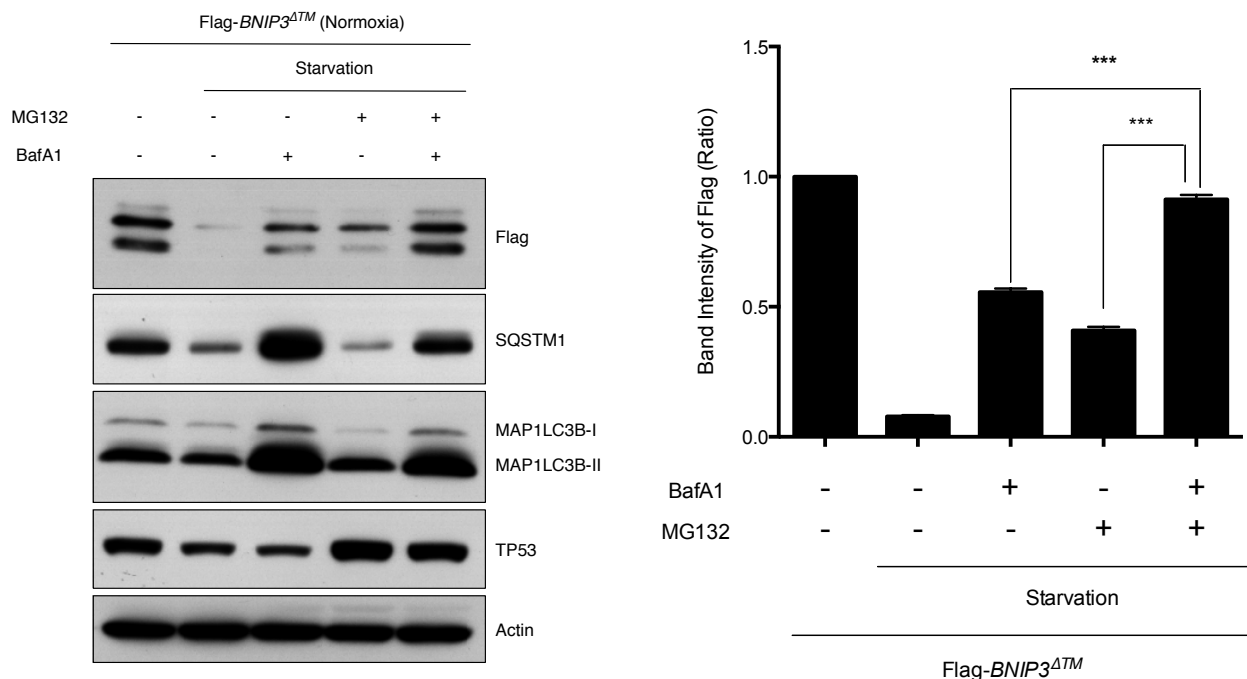

**Supplementary figure 5. BNIP3 is degraded by autophagy as well as UPS.** SK-Hep-1 cells were transfected with Flag-BNIP3 (A) or Flag-BNIP3<sup>ΔTM</sup> (B) under normoxia for 24 h and challenged with amino acid starvation in the presence or absence of BafA1 and/or MG132. SQSTM1 and MAP1LC3B were used as autophagy markers. TP53 expression was assessed for inhibition of UPS. BNIP3 expression levels were quantified by densitometry using the ImageJ software. Band intensities of BNIP3 protein were normalized by actin and compared to that of the first column. Data are shown as means ± S.D. for three separate experiments. \*P<0.05, \*\*\*P<0.0005, t test.

# Sup. Fig. 6

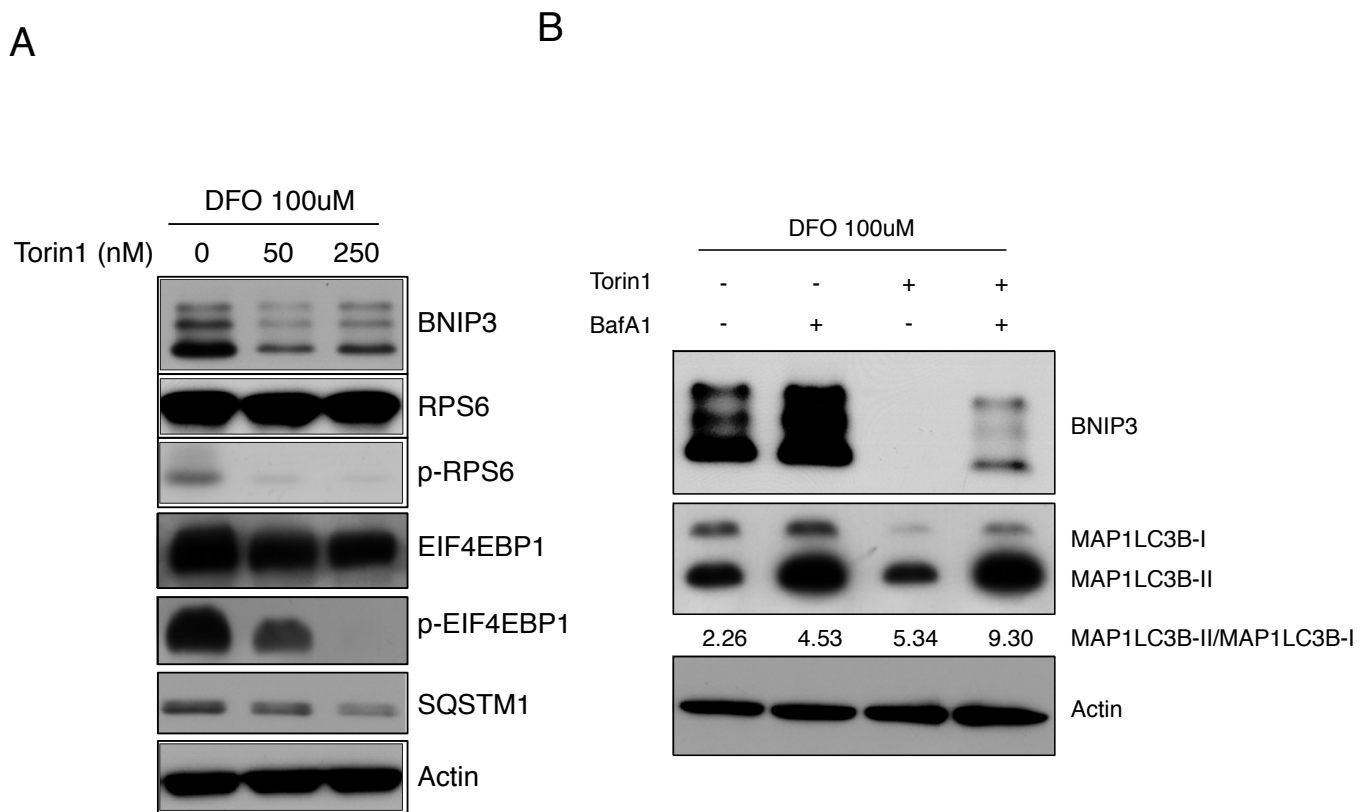

**Supplementary figure 6. BNIP3 degradation is mediated by the inhibition of MTORC1 under a hypoxia-mimicking condition.** (A) SK-Hep-1 cells were cultured under a hypoxia-mimicking condition (100  $\mu$ M DFO) for 24 h. Torin1 was added for an additional 4 h with the indicated dose followed by western blot analysis. (B) SK-Hep-1 cells were exposed to hypoxia or DFO for 24 h. After hypoxia, the cells were treated with 250 nM Torin1 in the presence or absence of BafA1. The ratio of MAP1LC3B-II to MAP1LC3B-I was assessed by densitometry.



# Sup. Fig. 7

A

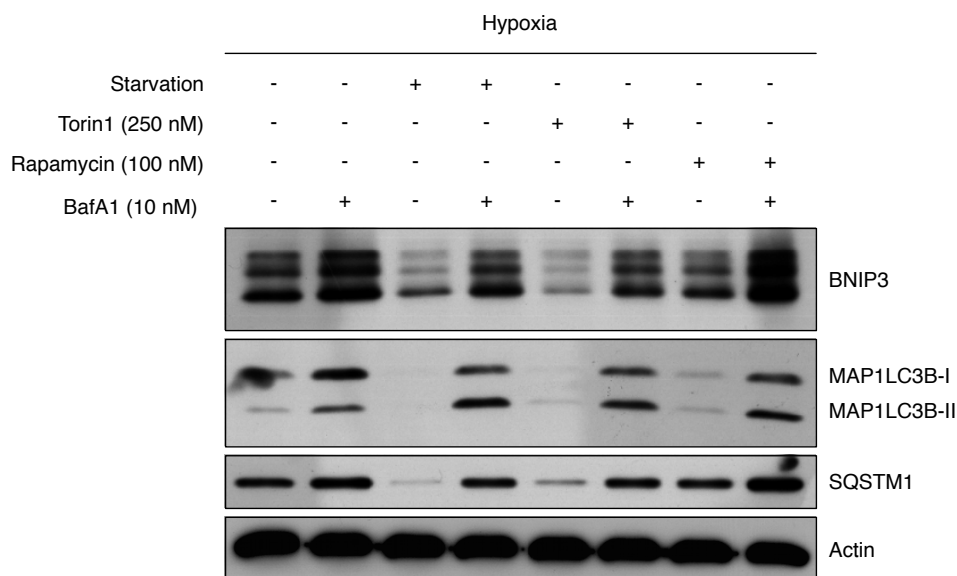

B

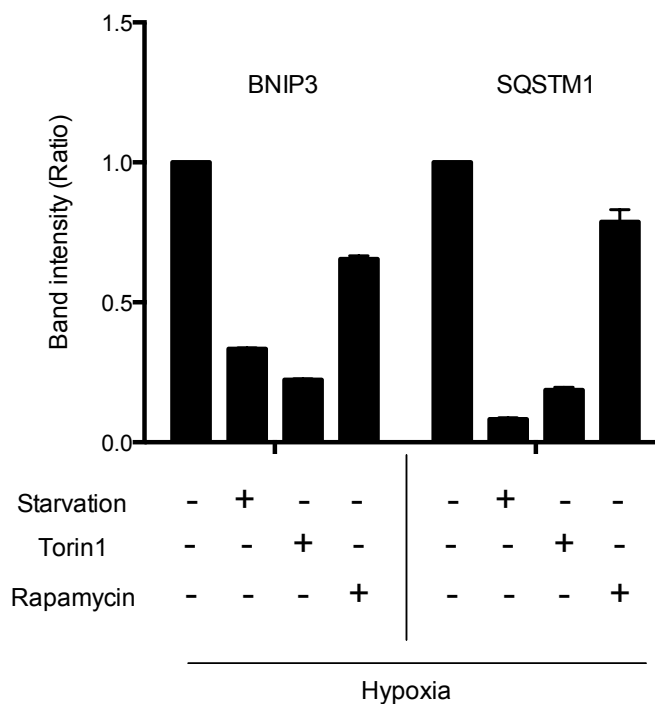

**Supplementary figure 7. Rapamycin is less effective than Torin1 for BNIP3 degradation .** (A) SK-Hep-1 cells were cultured under hypoxia for 24 h. Amino acid starvation, Torin1 treatment or rapamycin treatment was performed in the presence or absence of BafA1 for an additional 4 h with the indicated dose, followed by western blot analysis. (B) BNIP3 degradation and autophagy induction were analyzed by BNIP3 and SQSTM1 expression, respectively.

# Sup. Fig. 8

A

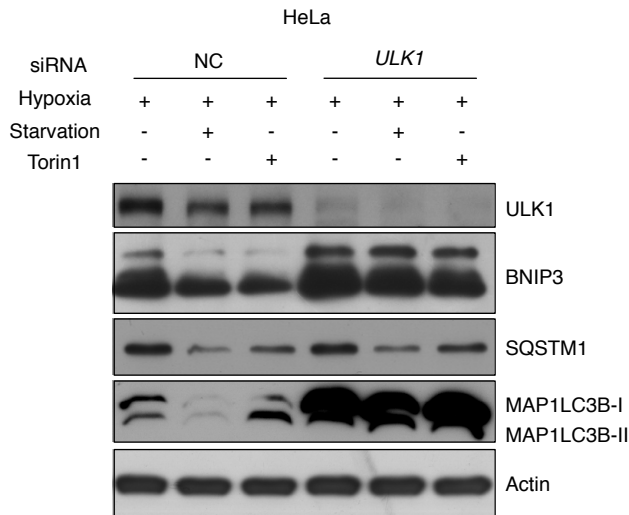

B

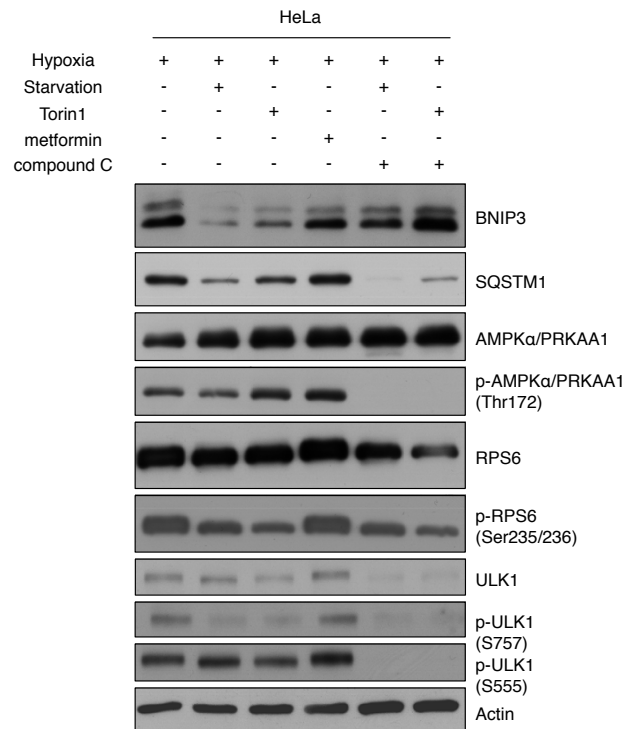

**Supplementary figure 8. Degradation of BNIP3 is regulated by ULK1 via MTORC1 and AMPK.** (A) HeLa cells were transfected with *ULK1* siRNA for 48 h and exposed to hypoxia for 24 h. Amino acid starvation or Torin1 treatment were included as challenges for an additional 4 h followed by western blot analysis. (B) HeLa cells were incubated under hypoxic condition for 24 h and then treated with 250 nM Torin1, 5 mM metformin or 20  $\mu$ M Compound C for 4 h. MTORC1 inhibition, AMPK activation or inhibition were confirmed by western blotting. ULK1 inhibition was assessed by the level of p-ULK1 (S757) and ULK1 activation by that of p-ULK1 (S555).

# Sup. Fig. 9

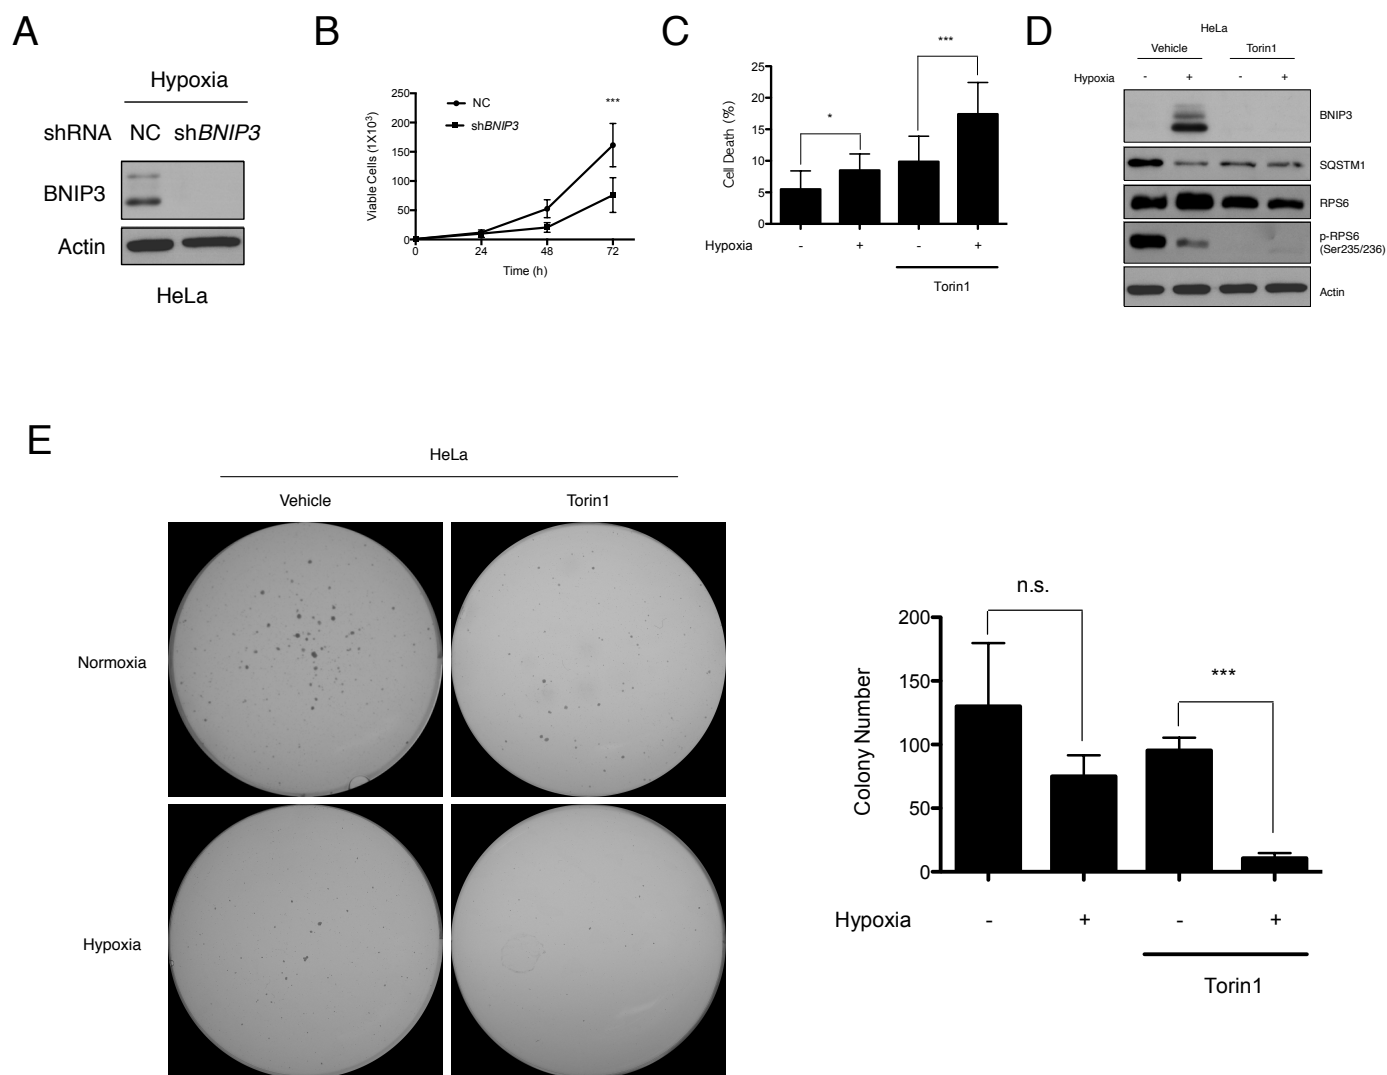

**Supplementary figure 9. Loss of BNIP3 limits the survival of HeLa cells under hypoxic conditions.** (A) Scrambled shRNA and *BNIP3* shRNA was transfected into HeLa cells. Knockdown of BNIP3 was confirmed by western blot analysis. (B) The selected stable cell lines were incubated under hypoxic conditions for up to 72 h. Proliferation was assessed by counting viable cells at the indicated time points. (C) HeLa cells were cultured under normoxia or hypoxia for 24 h followed by the Torin1 treatment for an additional 24 h. Cell death was assessed by the trypan blue exclusion assay. (D) The degradation of BNIP3, MTORC1 inhibition and the autophagy induction were confirmed by western blot analysis. (E) HeLa cells were incubated under normoxia or hypoxia for 24 h and then treated with Torin1 for 24 h. The long-term viability was analyzed by the soft agar assay. Data are shown as means  $\pm$  S.D. for three independent experiments performed in triplicate. t test; \* $P < 0.05$ , \*\*\* $P < 0.0005$ , n.s., not significant.

# Sup. Fig. 10

A

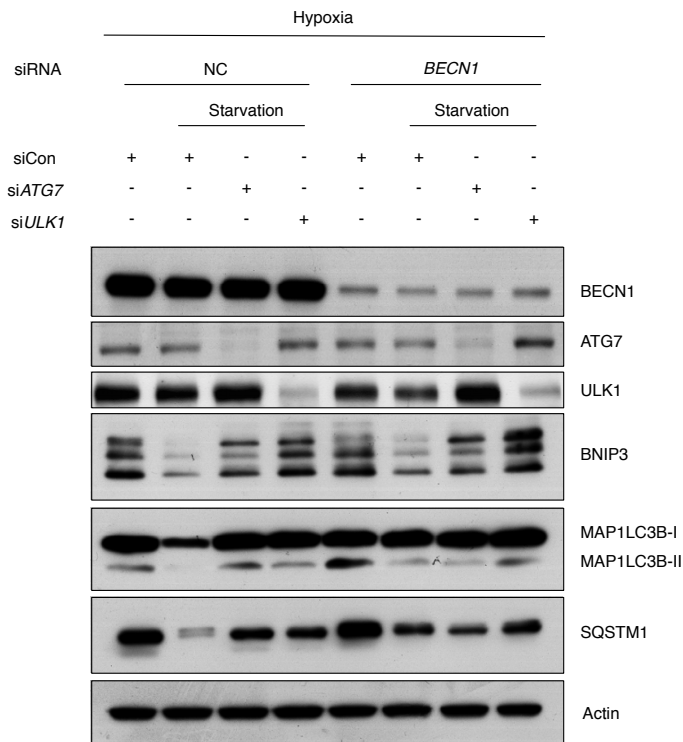

B

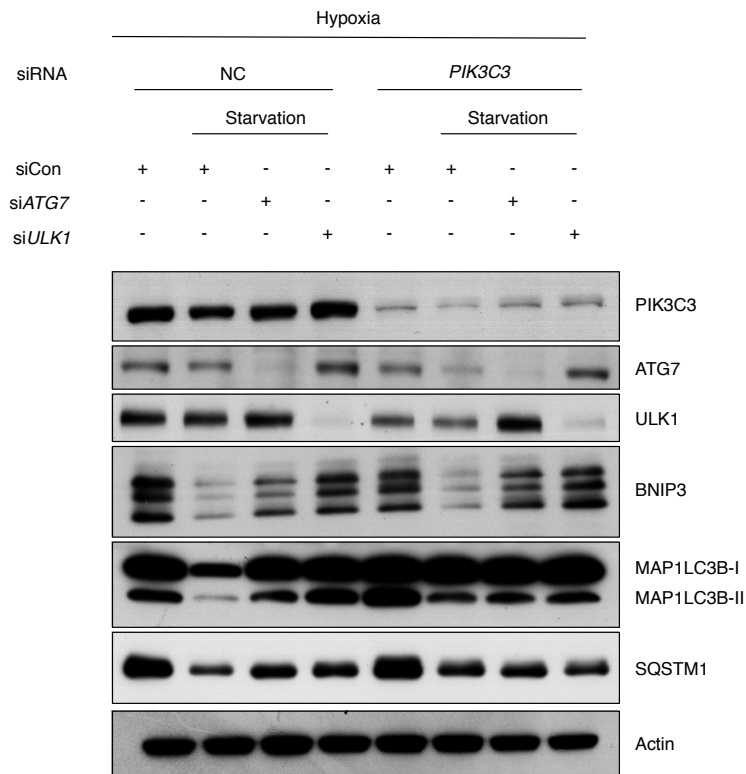

**Supplementary figure 10. BNIP3 is degraded in *BECN1*- or *PIK3C3*-depleted conditions and reversed by knockdown of *ATG7* or *ULK1*.** SK-Hep-1 cells were transfected with siRNA for *BECN1* (A) or *PIK3C3* (B) for 24 h followed by transfection with siRNA for *ATG7* or *ULK1* for 48 h. The transfected cells were incubated under hypoxia for 24 h and then amino acid starvation was performed for an additional 4 h followed by western blot analysis.

## Supplementary information

### Supplementary methods

*Plasmid Construction.* Full-length *BNIP3* and *BNIP3*<sup>ΔTM</sup> (aa 1-163) were amplified from human cDNA pool by PCR using the following primers: *BNIP3* (FL) : Fw=5'-GAACAAGCTTATGTCGCAGAACGGAGCGC-3', Rv=5'-CAGGGAATTCACCCCAGGATCTAACAGCTC-3' and *BNIP3*<sup>ΔTM</sup> : Fw=5'-GAACAAGCTTATGTCGCAGAACGGAGCGC-3', Rv=5'-GAGGGAATTCTCATTTCAGAAATTCTGCAG-3'. The PCR products were cloned into HindIII and EcoRI sites of pFLAG-CMV-2 Expression Vector (Sigma, E7033). The construction was verified by DNA sequence analysis.

*Real-time quantitative PCR (qPCR).* RNA was isolated by RNAeasy kit (Qiagen, 74104) using the manufacturer's instructions. For cDNA synthesis, M-MLV Reverse Transcriptase (Ambion, AM2043) and SUPERase-In RNase Inhibitor (Ambion, AM2694) were used. qPCR was performed on Light Cycler 2.0 (Roche, 03531414001) using SYBR<sup>®</sup> Premix Ex Taq<sup>™</sup> (Takara, PR041A), and data were analyzed with the Light Cycler software 4.05 (Roche). Primers were designed using Primer3 software. The primers for human *BNIP3* were: (FW) 5'-GATACCAACAGGGCTTCTGAAACAG-3' and (RV) 5'-CAGAGAATATGCCCCCTTTCTTCA-3'. The *GAPDH* gene was used as control. The primer sequences of *GAPDH* were : (FW)5'-CCTGGTATGACAACGAATTT-3' and (RV)5'-GTACATGACAAGGTGCGGCT-3'. Copy number of target genes (relative to *GAPDH*) was determined by the  $2^{-\Delta\Delta Ct}$  method.

*Autophagy analysis.* Quantitative GFP-LC3 assay was performed in SK-Hep-1 cells. SK-Hep-1 cells were transfected with a GFP-LC3-expressing plasmid (a gift from Dr. J. Jung, USC, USA) and then stable cells were selected with 800 ug/ml G418 (Calbiochem, 345810) for 4 weeks. The cells were plated on coverslip and cultured in normoxia, hypoxia and hypoxia plus starvation, respectively. The cells were then fixed and mounted on glass slides, and visualized using a confocal microscope (Olympus, Fluoview FV 1000, Japan). To quantify GFP-LC3 puncta, at least 4 random fields were imaged and the average number of puncta/cell was calculated using the ImageJ software (NIH). For the LC3 flux assay, SK-Hep-1 cells pretreated with hypoxia for 24 h followed by DMEM or EBSS in the presence or absence of 10 nM BafA1. Cells were harvested and lysed, the LC3 band was analyzed by western blotting. We quantified MAP1LC3B-II/MAP1LC3B-I ratios by densitometry as described above.

*Immunoprecipitation.* SK-Hep-1 cells were transfected with Flag-*BNIP3* or Flag-*BNIP3* <sup>$\Delta$ TM</sup> expression vectors followed by the amino acid starvation in the presence or absence of Baf A1 or MG132. Cells were lysed in 1 ml ice-cold lysis buffer containing 40 mM HEPES pH 7.5, 120 mM NaCl, 1 mM EDTA, 10 mM pyrophosphate, 10 mM glycerophosphate, 50 mM NaF, 0.3% CHAPS or 0.1% NP-40 and one tablet of EDTA-free protease inhibitors (Roche, 04 693 124 001) per 10 ml. Cell extracts were incubated with anti-Flag antibody overnight at 4°C. Then, 30  $\mu$ l of Protein G-Sepharose was added. After incubation for 2 hrs, the immunoprecipitates were washed three times with the lysis buffer and subjected to immunoblotting.

*Colony formation assay.* Scrambled shRNA and *BNIP3* shRNA was transfected into SK-Hep-1 cells and selected for one month. The selected stable cell lines were plated at low

density (1000 cells/well) in 6 well plates and then grown in hypoxic conditions for 7 d. Colonies are fixed and stained with crystal violet, and then colony numbers were counted.

Supplementary Table S1 : Primary antibodies used in the present study

| Target     | Host   | Type       | Titer  | Manufacturer                 | Cat. #            |
|------------|--------|------------|--------|------------------------------|-------------------|
| Flag       | Mouse  | monoclonal | 1:1000 | Sigma                        | F3165             |
| BNIP3L     | Mouse  | monoclonal | 1:1000 | Sigma                        | WH0000665<br>M1   |
| BNIP3      | Mouse  | monoclonal | 1:1000 | Novus                        | NB100–1543        |
| NBR1       | Mouse  | monoclonal | 1:1000 | Novus                        | H00004077-<br>M05 |
| LDHA       | Rabbit | monoclonal | 1:1000 | Cell Signaling<br>Technology | 2012              |
| RPS6KB1    | Rabbit | monoclonal | 1:1000 | Cell Signaling<br>Technology | 9202              |
| MAP1LC3B   | Rabbit | monoclonal | 1:1000 | Cell Signaling<br>Technology | 3868              |
| ATG7       | Rabbit | polyclonal | 1:1000 | Cell Signaling<br>Technology | 2631              |
| MTOR       | Rabbit | polyclonal | 1:1000 | Cell Signaling<br>Technology | 2972              |
| RPS6       | Rabbit | monoclonal | 1:4000 | Cell Signaling<br>Technology | 2217              |
| p-RPS6     | Rabbit | monoclonal | 1:4000 | Cell Signaling<br>Technology | 2211              |
| EIF4EBP1   | Rabbit | monoclonal | 1:4000 | Cell Signaling<br>Technology | 9644              |
| p-EIF4EBP1 | Rabbit | monoclonal | 1:4000 | Cell Signaling<br>Technology | 2855              |
| BAK1       | Rabbit | monoclonal | 1:1000 | Cell Signaling<br>Technology | 6947              |
| BID        | Rabbit | polyclonal | 1:1000 | Cell Signaling<br>Technology | 2002              |
| BAD        | Rabbit | polyclonal | 1:1000 | Cell Signaling<br>Technology | 9239              |
| BCL2L11    | Rabbit | monoclonal | 1:1000 | Cell Signaling<br>Technology | 2933              |
| BAX        | Rabbit | monoclonal | 1:1000 | Cell Signaling<br>Technology | 5023              |
| Actin      | Goat   | polyclonal | 1:4000 | Santa Cruz<br>Biotechnology  | sc-1615           |
| SQSTM1     | Mouse  | monoclonal | 1:1000 | Santa Cruz<br>Biotechnology  | sc-28359          |
| BECN1      | Rabbit | polyclonal | 1:1000 | Santa Cruz<br>Biotechnology  | sc-11427          |



|                                |            |            |                           |                           |           |
|--------------------------------|------------|------------|---------------------------|---------------------------|-----------|
| TP53                           | Mouse      | monoclonal | 1:1000                    | Santa Cruz Biotechnology  | sc-126    |
| HIF1A                          | Rabbit     | polyclonal | 1:1000                    | Bethyl Laboratories       | A300–286A |
| AMPK $\alpha$ /PRKAA1          | Rabbit     | monoclonal | 1:1000                    | Cell Signaling Technology | 5832      |
| p-AMPK $\alpha$ /PRKAA1 Rabbit | monoclonal | 1:1000     | Cell Signaling Technology | 2535                      |           |
| ULK1                           | Rabbit     | polyclonal | 1:1000                    | Cell Signaling Technology | 4773      |
| p-ULK1 (S555)                  | Rabbit     | monoclonal | 1:500                     | Cell Signaling Technology | 5869      |
| p-ULK1 (S757)                  | Rabbit     | polyclonal | 1:500                     | Cell Signaling Technology | 6888      |
| PIK3C3                         | Rabbit     | monoclonal | 1:500                     | Cell Signaling Technology | 4263      |
| MAP1LC3A                       | Rabbit     | monoclonal | 1:500                     | Cell Signaling Technology | 4599      |
| MAP1LC3C                       | Rabbit     | polyclonal | 1:2000                    | Millipore                 | AB15414   |
| TOMM20                         | Mouse      | monoclonal | 1:500                     | Santacruz                 | sc-17764  |
| COX4I1                         | Rabbit     | monoclonal | 1:1000                    | Cell Signaling Technology | 4850      |
| LAMP2                          | Rabbit     | monoclonal | 1:1000                    | Epitomics                 | 3660–1    |

Supplementary Table S2 : siRNA sequences

| Target          | Accession Number | Cat.#       | Sequence            |
|-----------------|------------------|-------------|---------------------|
| <i>BECN1</i>    | NM_003766        | D-010552-02 | GGAUGACAGUGAACAGUUA |
|                 |                  | D-010552-03 | UAAGAUGGGUCUGAAAUUU |
|                 |                  | D-010552-04 | GCCAACAGCUUCACUCUGA |
|                 |                  | D-010552-17 | UUGAAAACCAGAUGCGUUA |
| <i>MAP1LC3B</i> | NM_022818        | D-012846-01 | CAAAGUCCUUGUACCUGA  |
|                 |                  | D-012846-02 | GAUAAUAGAACGAUACAAG |
|                 |                  | D-012846-03 | GUAGAAGAUGUCCGACUUA |
|                 |                  | D-012846-04 | AGGAGACGUUCGGGAUGAA |
| <i>RPS6K</i>    | NM_003161        | J-003616-13 | CAUGGAACAUUGUGAGAAA |
|                 |                  | J-003616-14 | GGAAUGGGCAUAAGUUGUA |
|                 |                  | J-003616-15 | GUAAAUGGCUUGUGAUACU |
|                 |                  | J-003616-16 | CAAUUAGCAUGCAAGCUU  |
| <i>LAMP2</i>    | NM_002294        | D-011715-01 | AAUGAGUCCUGUGUGAUA  |
|                 |                  | D-011715-02 | CUACUUAGACUCAAUAGCA |
|                 |                  | D-011715-03 | ACAGUACGCUAUGAAACUA |
|                 |                  | D-011715-04 | GAUAAGGUUGCUUCAGUUA |
| <i>ULK1</i>     | NM_003565        | D-005049-01 | CCUAAAACGUGUCUUUUUU |
|                 |                  | D-005049-02 | ACUUGUAGGUGUUUAAGAA |
|                 |                  | D-005049-03 | GGUUAGCCCUGCCUGAAUC |
|                 |                  | D-005049-04 | UGUAGGUGUUUAAGAAUUG |

|                      |                            |             |                     |
|----------------------|----------------------------|-------------|---------------------|
| <i>MTOR</i>          | NM_004958                  | J-003008-11 | GGCCAUAGCUAGCCUCAUA |
|                      |                            | J-003008-12 | CAAAGGACUUCGCCCAUAA |
|                      |                            | J-003008-13 | GCAGAAUUGUCAAGGGUAU |
|                      |                            | J-003008-14 | CAAAGCACUACACUACAA  |
| <i>RPTOR</i>         | NM_020761                  | J-004107-05 | GGCCAUAGCUAGCCUCAUA |
|                      |                            | J-004107-06 | CAAAGGACUUCGCCCAUAA |
|                      |                            | J-004107-07 | GCAGAAUUGUCAAGGGUAU |
|                      |                            | J-004107-08 | CAAAGCACUACACUACAA  |
| <i>PIK3C3</i>        | NM_002647                  | J-005250-09 | CACCAAAGCUCAUCGACAA |
|                      |                            | J-005250-10 | AUAGAUAGCUCCCAAUUA  |
|                      |                            | J-005250-11 | GAACAACGGUUUCGCUCUU |
|                      |                            | J-005250-12 | GAGAUGUACUUGAACGUAA |
| <i>MAP1LC3A</i>      | NM_032514,<br>NM_181509    | J-013579-05 | GGACGGCUUCCUCUAUAUG |
|                      |                            | J-013579-06 | CGGUGAUCAUCGAGCGCUA |
|                      |                            | J-013579-07 | UCGCGGACAUCUACGAGCA |
|                      |                            | J-013579-08 | UGAGCGAGUUGGUCAAGAU |
| <i>MAP1LC3<br/>C</i> | NM_001004343               | J-032399-09 | CUGGUCAGCAUGAGCGCAA |
|                      |                            | J-032399-10 | CGGUGGUAGUGGAGCGCUA |
|                      |                            | J-032399-11 | CAGAAAAUCCCAAGCGUCA |
|                      |                            | J-032399-12 | GUGUAAUGAGCUAGAGAU  |
| <i>ATG7</i>          | NM_001136031;<br>NM_006395 | J-020112-05 | CCAACACACUCGAGUCUUU |
|                      |                            | J-020112-06 | GAUCUAAAUCUCAACUGA  |
|                      |                            | J-020112-07 | GCCCACAGAUGGAGUAGCA |
|                      |                            | J-020112-08 | GCCAGAGGAUUCAACAUGA |

Supplementary Table S3 : shRNA sequences

| Target        | Accession Number | Cat.#              | Sequence                                                          |
|---------------|------------------|--------------------|-------------------------------------------------------------------|
| <i>ATG7</i>   | NM_006395.<br>1  | TRCN000000758<br>7 | CCGGCCCAGCTATTGGAACACTGTAC<br>TCGAGTACAGTGTTCCAATAGCTGGG<br>TTTTT |
|               |                  | TRCN000000758<br>5 | CCGGCCAGAGAGTTTACCTCTCATTC<br>TCGAGAATGAGAGGTAAACTCTCTGG<br>TTTTT |
| <i>BNIP3</i>  | NM_004052.<br>2  | TRCN000000783<br>2 | CCGGGCTTCTGAAACAGATACCCATC<br>TCGAGATGGGTATCTGTTTCAGAAGC<br>TTTTT |
|               |                  | TRCN000000783<br>3 | CCGGGAACTGCACTTCAGCAATAATC<br>TCGAGATTATTGCTGAAGTGCAGTTC<br>TTTTT |
| Non-Targeting |                  | SHC002V            | CCGGCAACAAGATGAAGAGCACCAAC<br>TCGAGTTGGTGCTCTTCATCTTGTTG<br>TTTTT |

# Sup. Fig. 1



**Supplementary figure 1. Short-term reoxygenation has little effect on the BNIP3 degradation.** SK-Hep-1 cells were incubated under hypoxic conditions for 24 h and exposed to normoxia for indicated time points. For comparison, SK-Hep-1 cells were incubated under hypoxia and exposed to hypoxia for another 4 h. The BNIP3 level was assessed by western blot analysis.

# Sup. Fig. 2

A



B



# Sup. Fig. 2

C

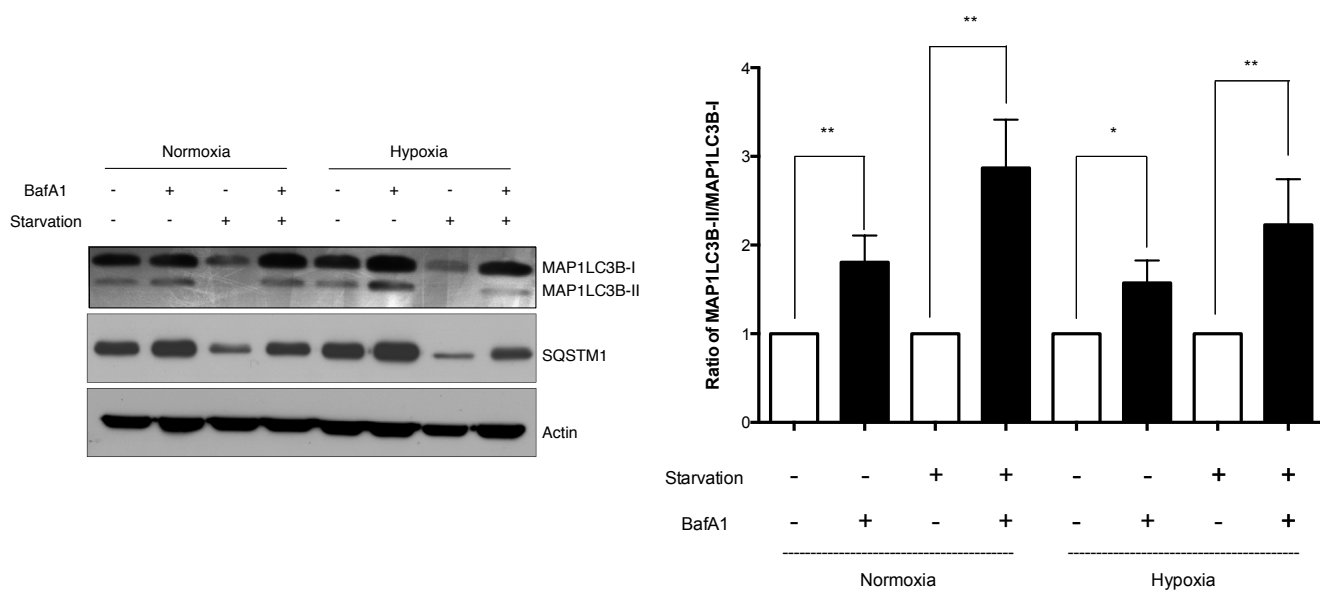

**Supplementary figure 2. Autophagy occurs under hypoxic-starved condition inducing BNIP3 degradation.** (A) SK-Hep-1 and HeLa cells were incubated under normoxic or hypoxic condition for 24 h followed by starvation under hypoxia for additional 4 h. The BNIP3 level was analyzed by western blotting. MAP1LC3B and SQSTM1 expression were used as autophagy markers. (B) SK-Hep-1 cells were transfected with *GFP-MAP1LC3B* and selected with G418. SK-Hep-1 cells stably expressing GFP-MAP1LC3B were exposed to normoxia and hypoxia for 24 h respectively or hypoxia (24 h) plus starvation (4 h) and then visualized by fluorescence microscopy (600 x). The number of GFP-MAP1LC3B dots was quantified using the ImageJ software. (C) SK-Hep-1 cells were exposed to normoxia or hypoxia in the presence or absence of amino acids and/or BafA1. The conversion of MAP1LC3B-I to MAP1LC3B-II, indicating the autophagy flux, was assessed by western blot analysis. Densitometric quantification of MAP1LC3B-II/MAP1LC3B-I levels were analyzed using the ImageJ software. The relative ratio of MAP1LCB-II/MAP1LC3B-I with the BafA1 treatment was compared with that without the treatment. Data are shown as means  $\pm$  S.D. for three separate experiments. \* $P < 0.05$ , \*\* $P < 0.0005$ , t test; n.s., not significant.

# Sup. Fig. 3

A



B



**Supplementary figure 3. Degradation of BNIP3 has little dependency on the BECN1 complex.**

(A) SK-Hep-1 cells were transfected with *BECN1* siRNA for 48 h and incubated under hypoxia for 24 h. Amino acid starvation or rapamycin treatment were performed for an additional 4 h. For the knockdown of RPTOR, SK-Hep-1 cells were transfected with *RPTOR* siRNA for 48 h following the transfection of *BECN1* siRNA. Subsequently, SK-Hep-1 cells were exposed to hypoxia for 24 h followed by western blot analysis. (B) SK-Hep-1 cells were transfected with *PIK3C3* siRNA for 48 h and exposed to hypoxia for 24 h. Amino acid starvation or Torin1 treatment were carried out for an additional 4 h followed by western blot analysis.



# Sup. Fig. 4

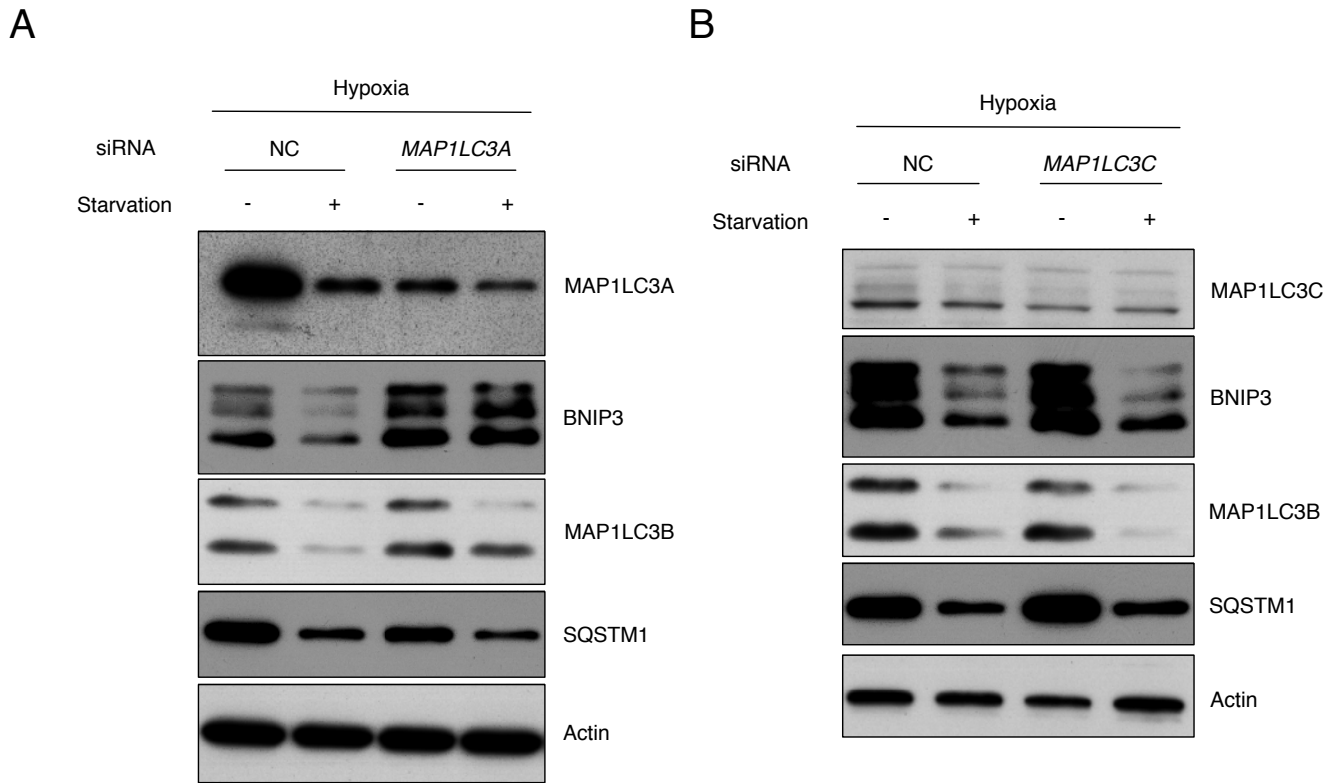

**Supplementary figure 4. Autophagic degradation of BNIP3 is dependent on MAP1LC3A, not MAP1LC3C.** SK-Hep-1 cells were transfected with *MAP1LC3A* (A) and *MAP1LC3C* (B) siRNAs for 48 h and exposed to hypoxia for 24 h. This was followed by a period of amino acid starvation for an additional 4 h and subsequent western blot analysis.

# Sup. Fig. 5

A



B

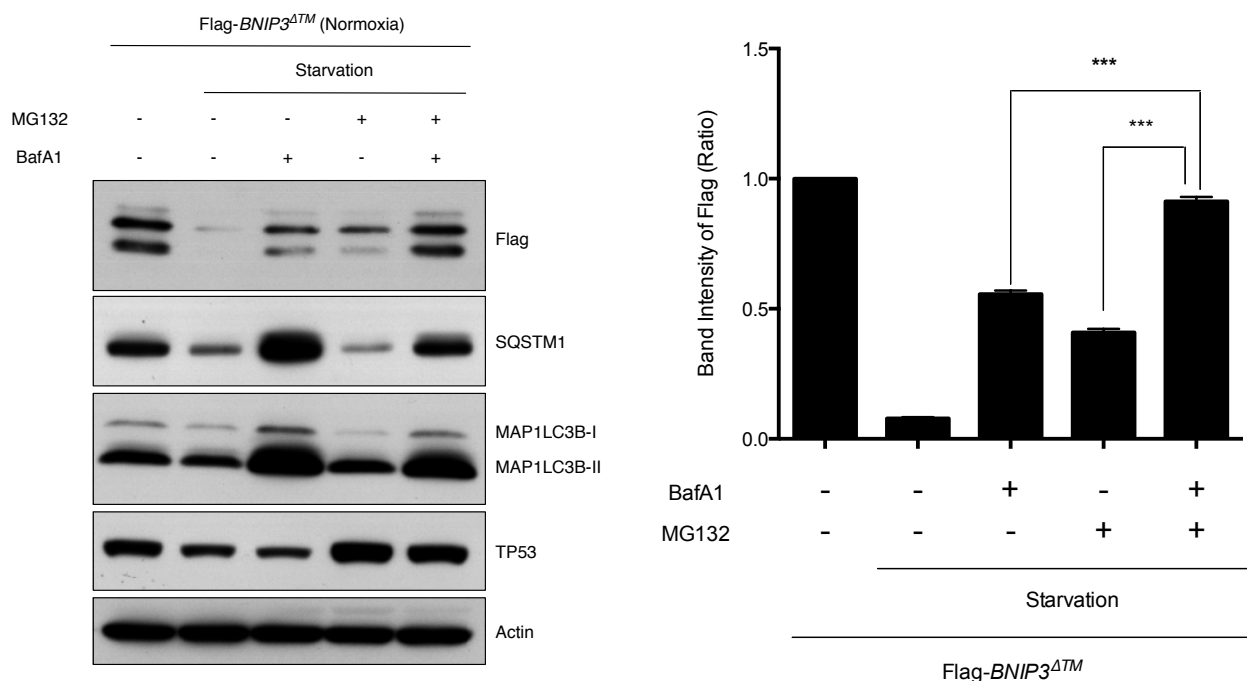

**Supplementary figure 5. BNIP3 is degraded by autophagy as well as UPS.** SK-Hep-1 cells were transfected with Flag-BNIP3 (A) or Flag-BNIP3<sup>ΔTM</sup> (B) under normoxia for 24 h and challenged with amino acid starvation in the presence or absence of BafA1 and/or MG132. SQSTM1 and MAP1LC3B were used as autophagy markers. TP53 expression was assessed for inhibition of UPS. BNIP3 expression levels were quantified by densitometry using the ImageJ software. Band intensities of BNIP3 protein were normalized by actin and compared to that of the first column. Data are shown as means ± S.D. for three separate experiments. \*P<0.05, \*\*\*P<0.0005, t test.

# Sup. Fig. 6

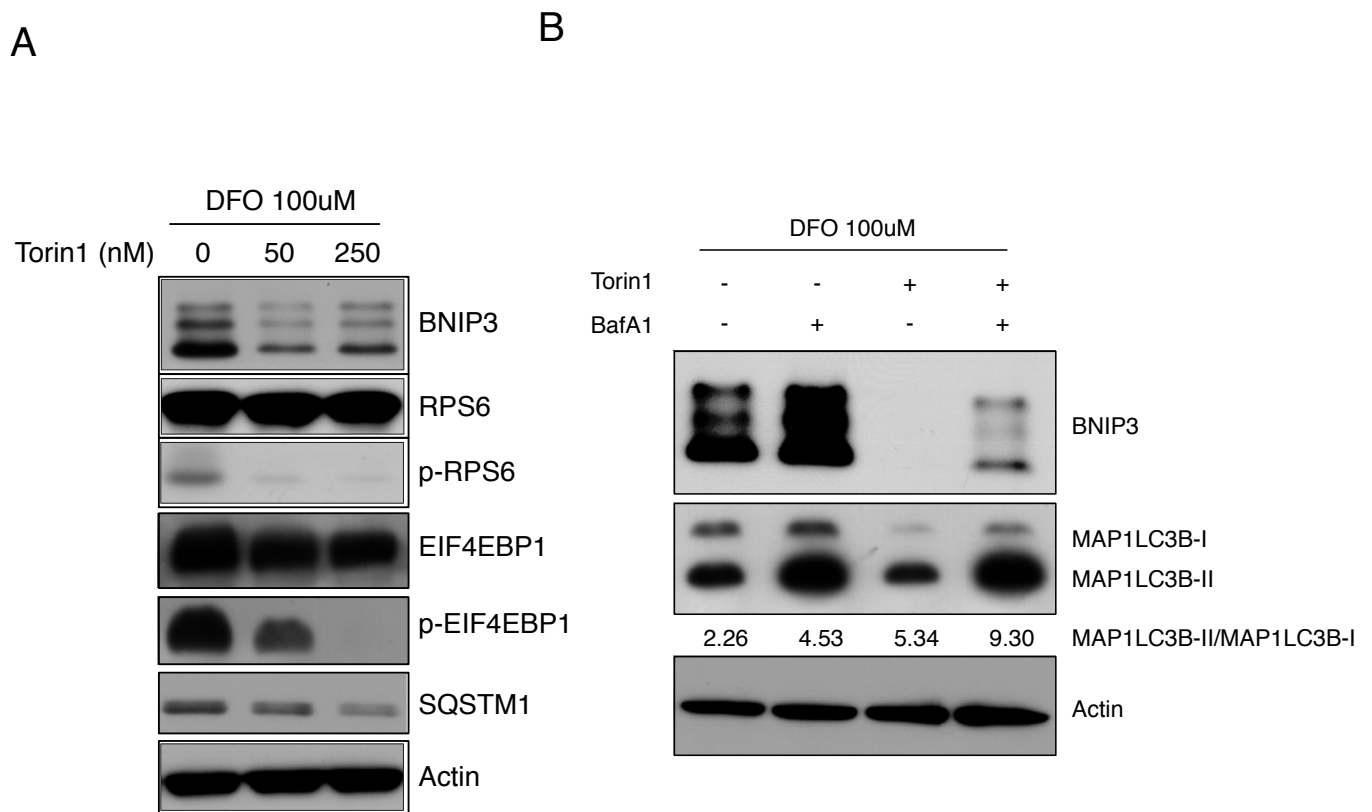

**Supplementary figure 6. BNIP3 degradation is mediated by the inhibition of MTORC1 under a hypoxia-mimicking condition.** (A) SK-Hep-1 cells were cultured under a hypoxia-mimicking condition (100  $\mu$ M DFO) for 24 h. Torin1 was added for an additional 4 h with the indicated dose followed by western blot analysis. (B) SK-Hep-1 cells were exposed to hypoxia or DFO for 24 h. After hypoxia, the cells were treated with 250 nM Torin1 in the presence or absence of BafA1. The ratio of MAP1LC3B-II to MAP1LC3B-I was assessed by densitometry.

# Sup. Fig. 7

A



B

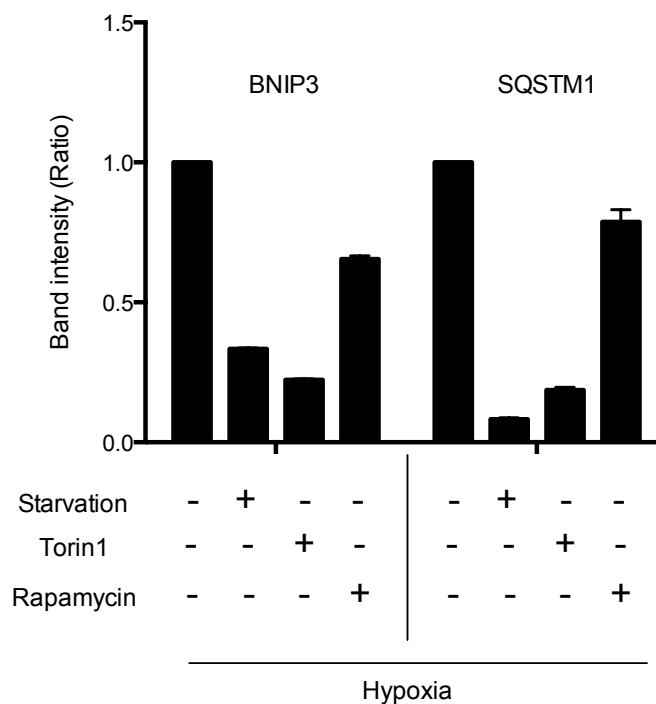

**Supplementary figure 7. Rapamycin is less effective than Torin1 for BNIP3 degradation .** (A) SK-Hep-1 cells were cultured under hypoxia for 24 h. Amino acid starvation, Torin1 treatment or rapamycin treatment was performed in the presence or absence of BafA1 for an additional 4 h with the indicated dose, followed by western blot analysis. (B) BNIP3 degradation and autophagy induction were analyzed by BNIP3 and SQSTM1 expression, respectively.

# Sup. Fig. 8

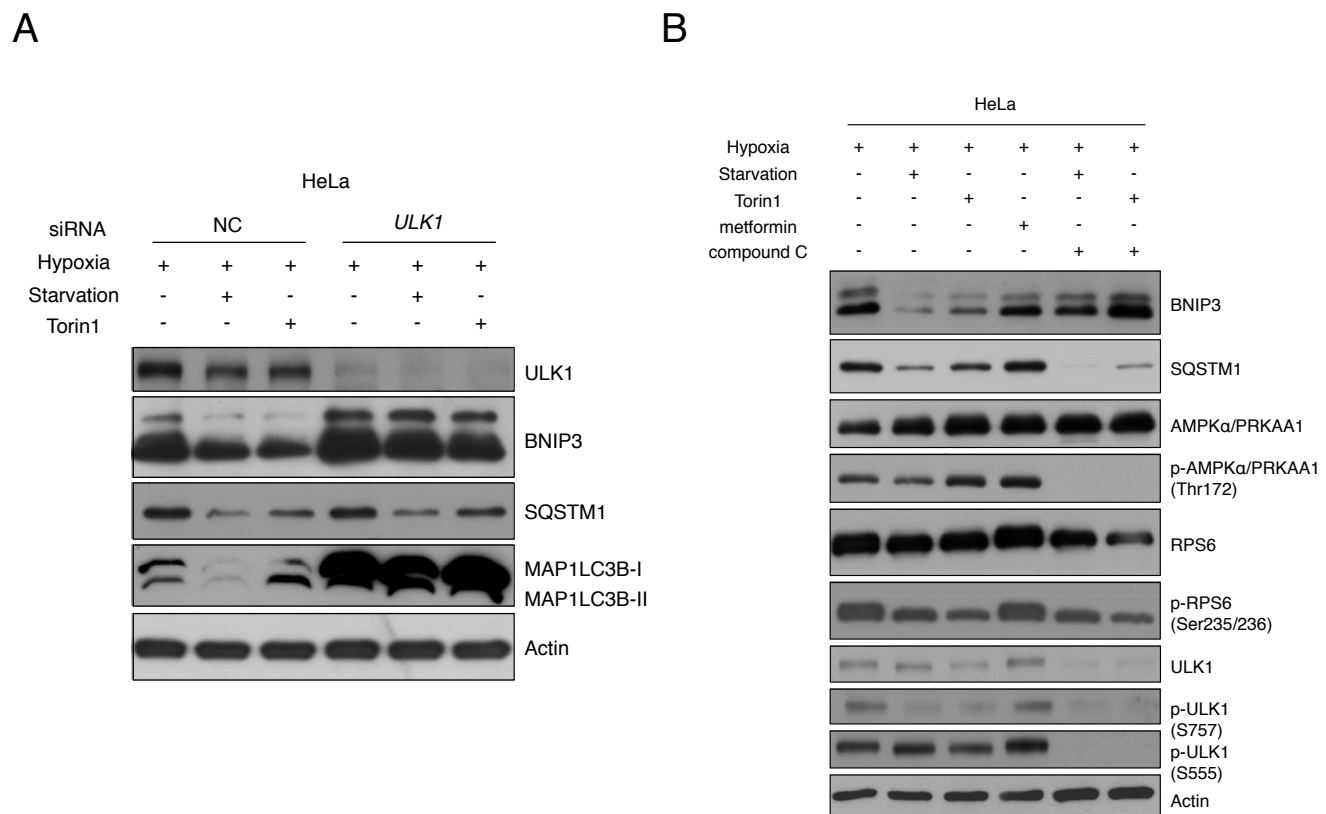

**Supplementary figure 8. Degradation of BNIP3 is regulated by ULK1 via MTORC1 and AMPK.** (A) HeLa cells were transfected with *ULK1* siRNA for 48 h and exposed to hypoxia for 24 h. Amino acid starvation or Torin1 treatment were included as challenges for an additional 4 h followed by western blot analysis. (B) HeLa cells were incubated under hypoxic condition for 24 h and then treated with 250 nM Torin1, 5 mM metformin or 20  $\mu$ M Compound C for 4 h. MTORC1 inhibition, AMPK activation or inhibition were confirmed by western blotting. ULK1 inhibition was assessed by the level of p-ULK1 (S757) and ULK1 activation by that of p-ULK1 (S555).

# Sup. Fig. 9



**Supplementary figure 9. Loss of BNIP3 limits the survival of HeLa cells under hypoxic conditions.** (A) Scrambled shRNA and *BNIP3* shRNA was transfected into HeLa cells. Knockdown of BNIP3 was confirmed by western blot analysis. (B) The selected stable cell lines were incubated under hypoxic conditions for up to 72 h. Proliferation was assessed by counting viable cells at the indicated time points. (C) HeLa cells were cultured under normoxia or hypoxia for 24 h followed by the Torin1 treatment for an additional 24 h. Cell death was assessed by the trypan blue exclusion assay. (D) The degradation of BNIP3, MTORC1 inhibition and the autophagy induction were confirmed by western blot analysis. (E) HeLa cells were incubated under normoxia or hypoxia for 24 h and then treated with Torin1 for 24 h. The long-term viability was analyzed by the soft agar assay. Data are shown as means  $\pm$  S.D. for three independent experiments performed in triplicate. t test; \* $P < 0.05$ , \*\*\* $P < 0.0005$ , n.s., not significant.

# Sup. Fig. 10

A



B



**Supplementary figure 10. BNIP3 is degraded in *BECN1*- or *PIK3C3*-depleted conditions and reversed by knockdown of *ATG7* or *ULK1*.** SK-Hep-1 cells were transfected with siRNA for *BECN1* (A) or *PIK3C3* (B) for 24 h followed by transfection with siRNA for *ATG7* or *ULK1* for 48 h. The transfected cells were incubated under hypoxia for 24 h and then amino acid starvation was performed for an additional 4 h followed by western blot analysis.
